# Supplementary material
Source: HighWire-hosted journal article supplement (https://jnm.snmjournals.org/highwire/filestream/95438/field_highwire_adjunct_files/0/217976_Supplemental_Data.pdf)
Supplement: 217976_Supplemental_Data.pdf [file 217976_Supplemental_Data.pdf]

**SUPPLEMENTAL TABLE 1.** Acquisition parameters of the head and neck magnetic resonance imaging sequences.

|                         | <b>Slice mm</b> | <b>Gap mm</b> | <b>TR ms</b> | <b>TE ms</b> | <b>Scan type</b> | <b>TI ms</b> | <b>B-value</b> |
|-------------------------|-----------------|---------------|--------------|--------------|------------------|--------------|----------------|
| <b>STIR</b>             | 5               | 0,5           | 5909         | 70           | 2D/IR            | 165          |                |
| <b>T1w</b>              | 4               | 0,4           | 586          | 15           | 2D/TSE           |              |                |
| <b>T2w</b>              | 4               | 0,4           | 3742         | 80           | 2D/TSE           |              |                |
| <b>DWI</b>              | 4               | 0             | 11711        | 104          | 2D/GRA           |              | 0+800          |
| <b>T1w gd<br/>Trans</b> | 4               | 0,4           | 586          | 15           | 2D/TSE           |              |                |
| <b>T1w gd<br/>Cor</b>   | 4               | 0,4           | 558          | 14           | 2D/TSE           |              |                |

STIR=Short-TI Inversion Recovery, T1w=T1 weighted image, T2w=T2 weighted image DWI=Diffusion weighted imaging, TR ms= Repetition time in milliseconds, TE ms=Echo time in milliseconds, TI ms=Inversion time in milliseconds, 2D/IR= Two-Dimensional Inversion-Recovery, 2D/TSE= Two-Dimensional Turbo Spin-Echo, 2D/GRA= Two-Dimensional Gradient-Echo.

**SUPPLEMENTAL TABLE 2.** The net reclassification improvement (NRI) for staging of recurrent head and neck squamous cell carcinoma staging based.

| CXR/MRI                      | PET/CT stage       |                  |            |                  |             |                               |
|------------------------------|--------------------|------------------|------------|------------------|-------------|-------------------------------|
|                              | Number of patients |                  |            | Reclassified (%) |             |                               |
|                              | Localized          | Locally advanced | Metastatic | Up-staged        | Down-staged | Net correctly classified      |
| <b>Patients alive (n=47)</b> |                    |                  |            |                  |             |                               |
| Localized                    | 15                 | 9                | 0          | 10 (21.3%)       | 5 (10.6%)   | -10.7%                        |
| Locally advanced             | 5                  | 17               | 1          |                  |             |                               |
| Metastatic                   | 0                  | 0                | 0          |                  |             |                               |
| <b>Patients died (n=63)</b>  |                    |                  |            |                  |             |                               |
| Localized                    | 3                  | 10               | 7          | 40 (63.5%)       | 1 (1.6%)    | 61.9%                         |
| Locally advanced             | 0                  | 13               | 23         |                  |             |                               |
| Metastatic                   | 0                  | 1                | 6          |                  |             |                               |
| <b>NRI (95% CI)</b>          |                    |                  |            |                  |             | <b>51.2% (29.9% to 72.5%)</b> |
| <b>p-value</b>               |                    |                  |            |                  |             | <b>&lt;0.001</b>              |

CI =confidence interval, CXR=chest X-ray, MRI=magnetic resonance imaging of the head and neck, PET/CT=<sup>18</sup>F-FDG-PET/CT.

**SUPPLEMENTAL TABLE 3.** The net reclassification improvement (NRI) for staging of recurrent head and neck squamous cell carcinoma staging based.

| CCT/MRI                         | PET/CT stage       |                  |            |                  |             |                                             |
|---------------------------------|--------------------|------------------|------------|------------------|-------------|---------------------------------------------|
|                                 | Number of patients |                  |            | Reclassified (%) |             |                                             |
|                                 | Localized          | Locally advanced | Metastatic | Up-staged        | Down-staged | Net correctly classified                    |
| <b>Patients alive (n=47)</b>    |                    |                  |            |                  |             |                                             |
| Localized                       | 10                 | 4                | 0          | 5 (10.6%)        | 20 (42.6%)  | 32.0%                                       |
| Locally advanced                | 4                  | 12               | 1          |                  |             |                                             |
| Metastatic                      | 6                  | 10               | 0          |                  |             |                                             |
| <b>Patients died (n=63)</b>     |                    |                  |            |                  |             |                                             |
| Localized                       | 3                  | 9                | 1          | 27 (42.9%)       | 1 (1.6%)    | 41.3%                                       |
| Locally advanced                | 0                  | 14               | 17         |                  |             |                                             |
| Metastatic                      | 0                  | 1                | 18         |                  |             |                                             |
| <b>NRI (95% CI)<br/>p-value</b> |                    |                  |            |                  |             | <b>73.3% (54.3% to 92.3%)<br/>&lt;0.001</b> |

CCT=chest Computed tomography, CI =confidence interval, PET/CT=<sup>18</sup>F-FDG-PET/CT.
